# Supplementary material for: Transcriptional Profiles of Leukocyte Populations Provide a Tool for Interpreting Gene Expression Patterns Associated with High Fat Diet in Mice
Source: PLOS journal article supplement (doi:10.1371/journal.pone.0011861), 2010-07-29

# HF-Increased Genes: Significant GO Biological Process Terms (Males)

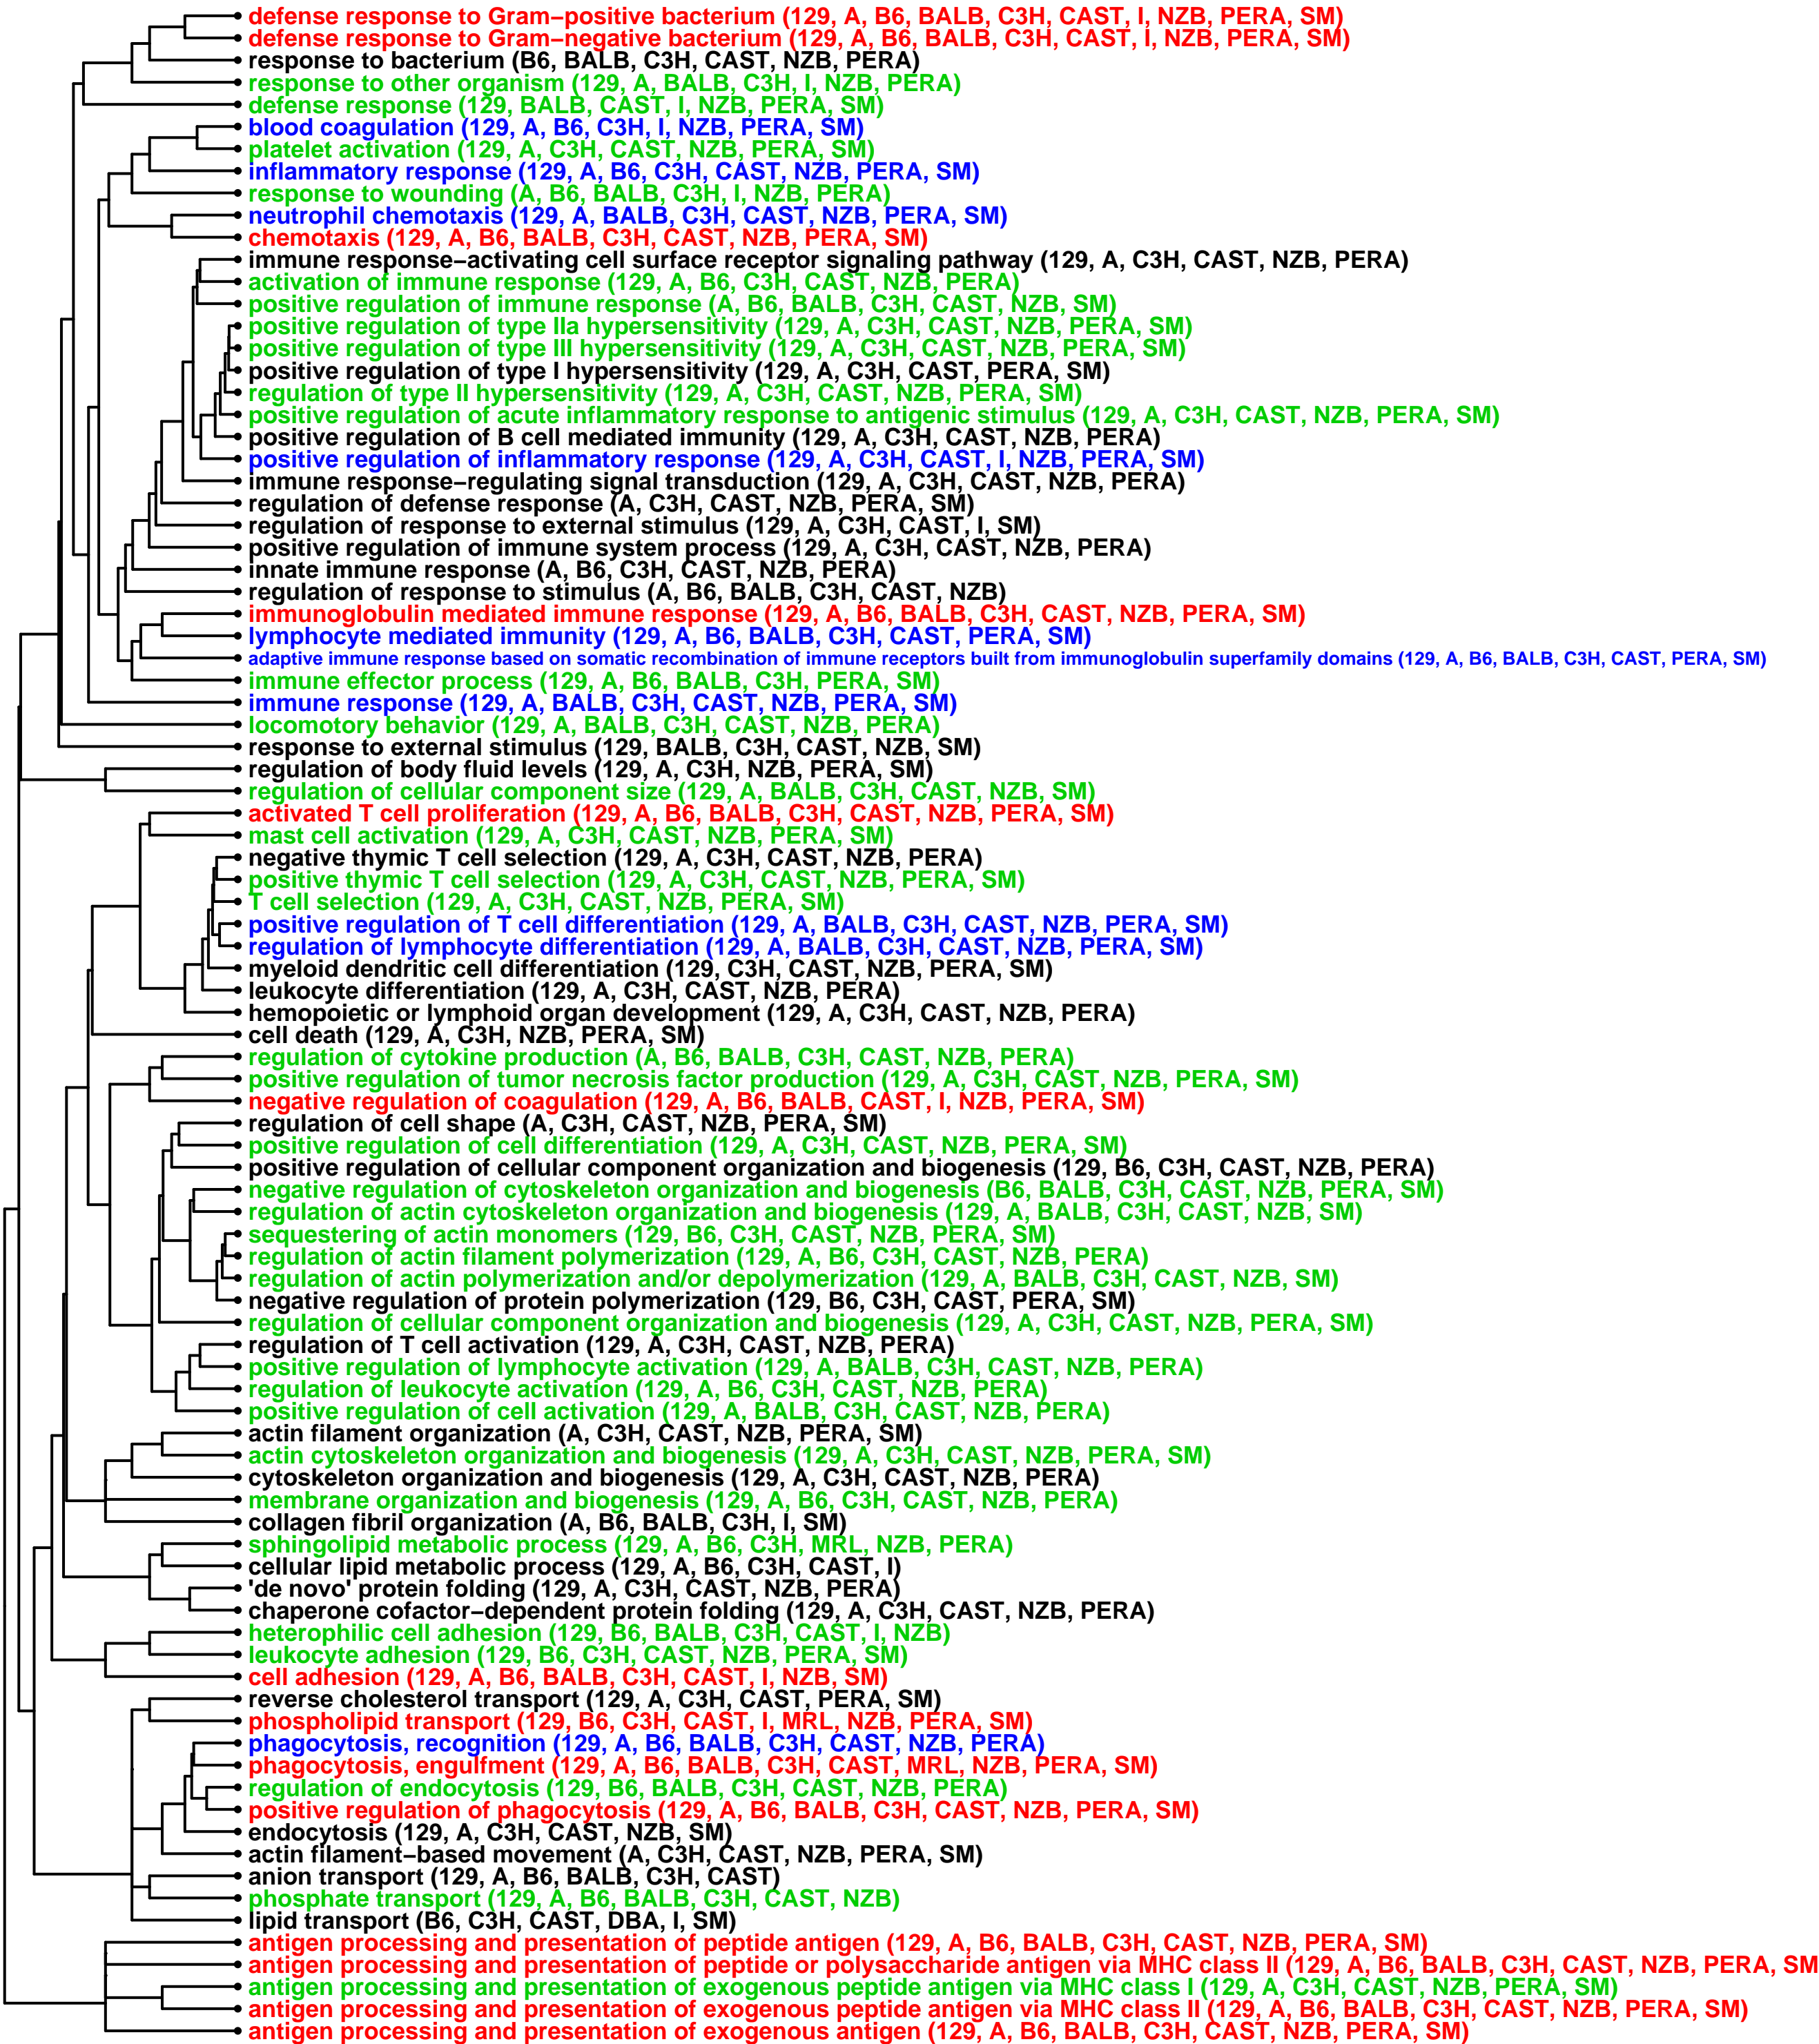

Supplement: S1 (10.1371/journal.pone.0011861.s001) [file journal.pone.0011861.s001]
