# Supplementary material for: Transcriptional Profiles of Leukocyte Populations Provide a Tool for Interpreting Gene Expression Patterns Associated with High Fat Diet in Mice
Source: PLOS journal article supplement (doi:10.1371/journal.pone.0011861), 2010-07-29

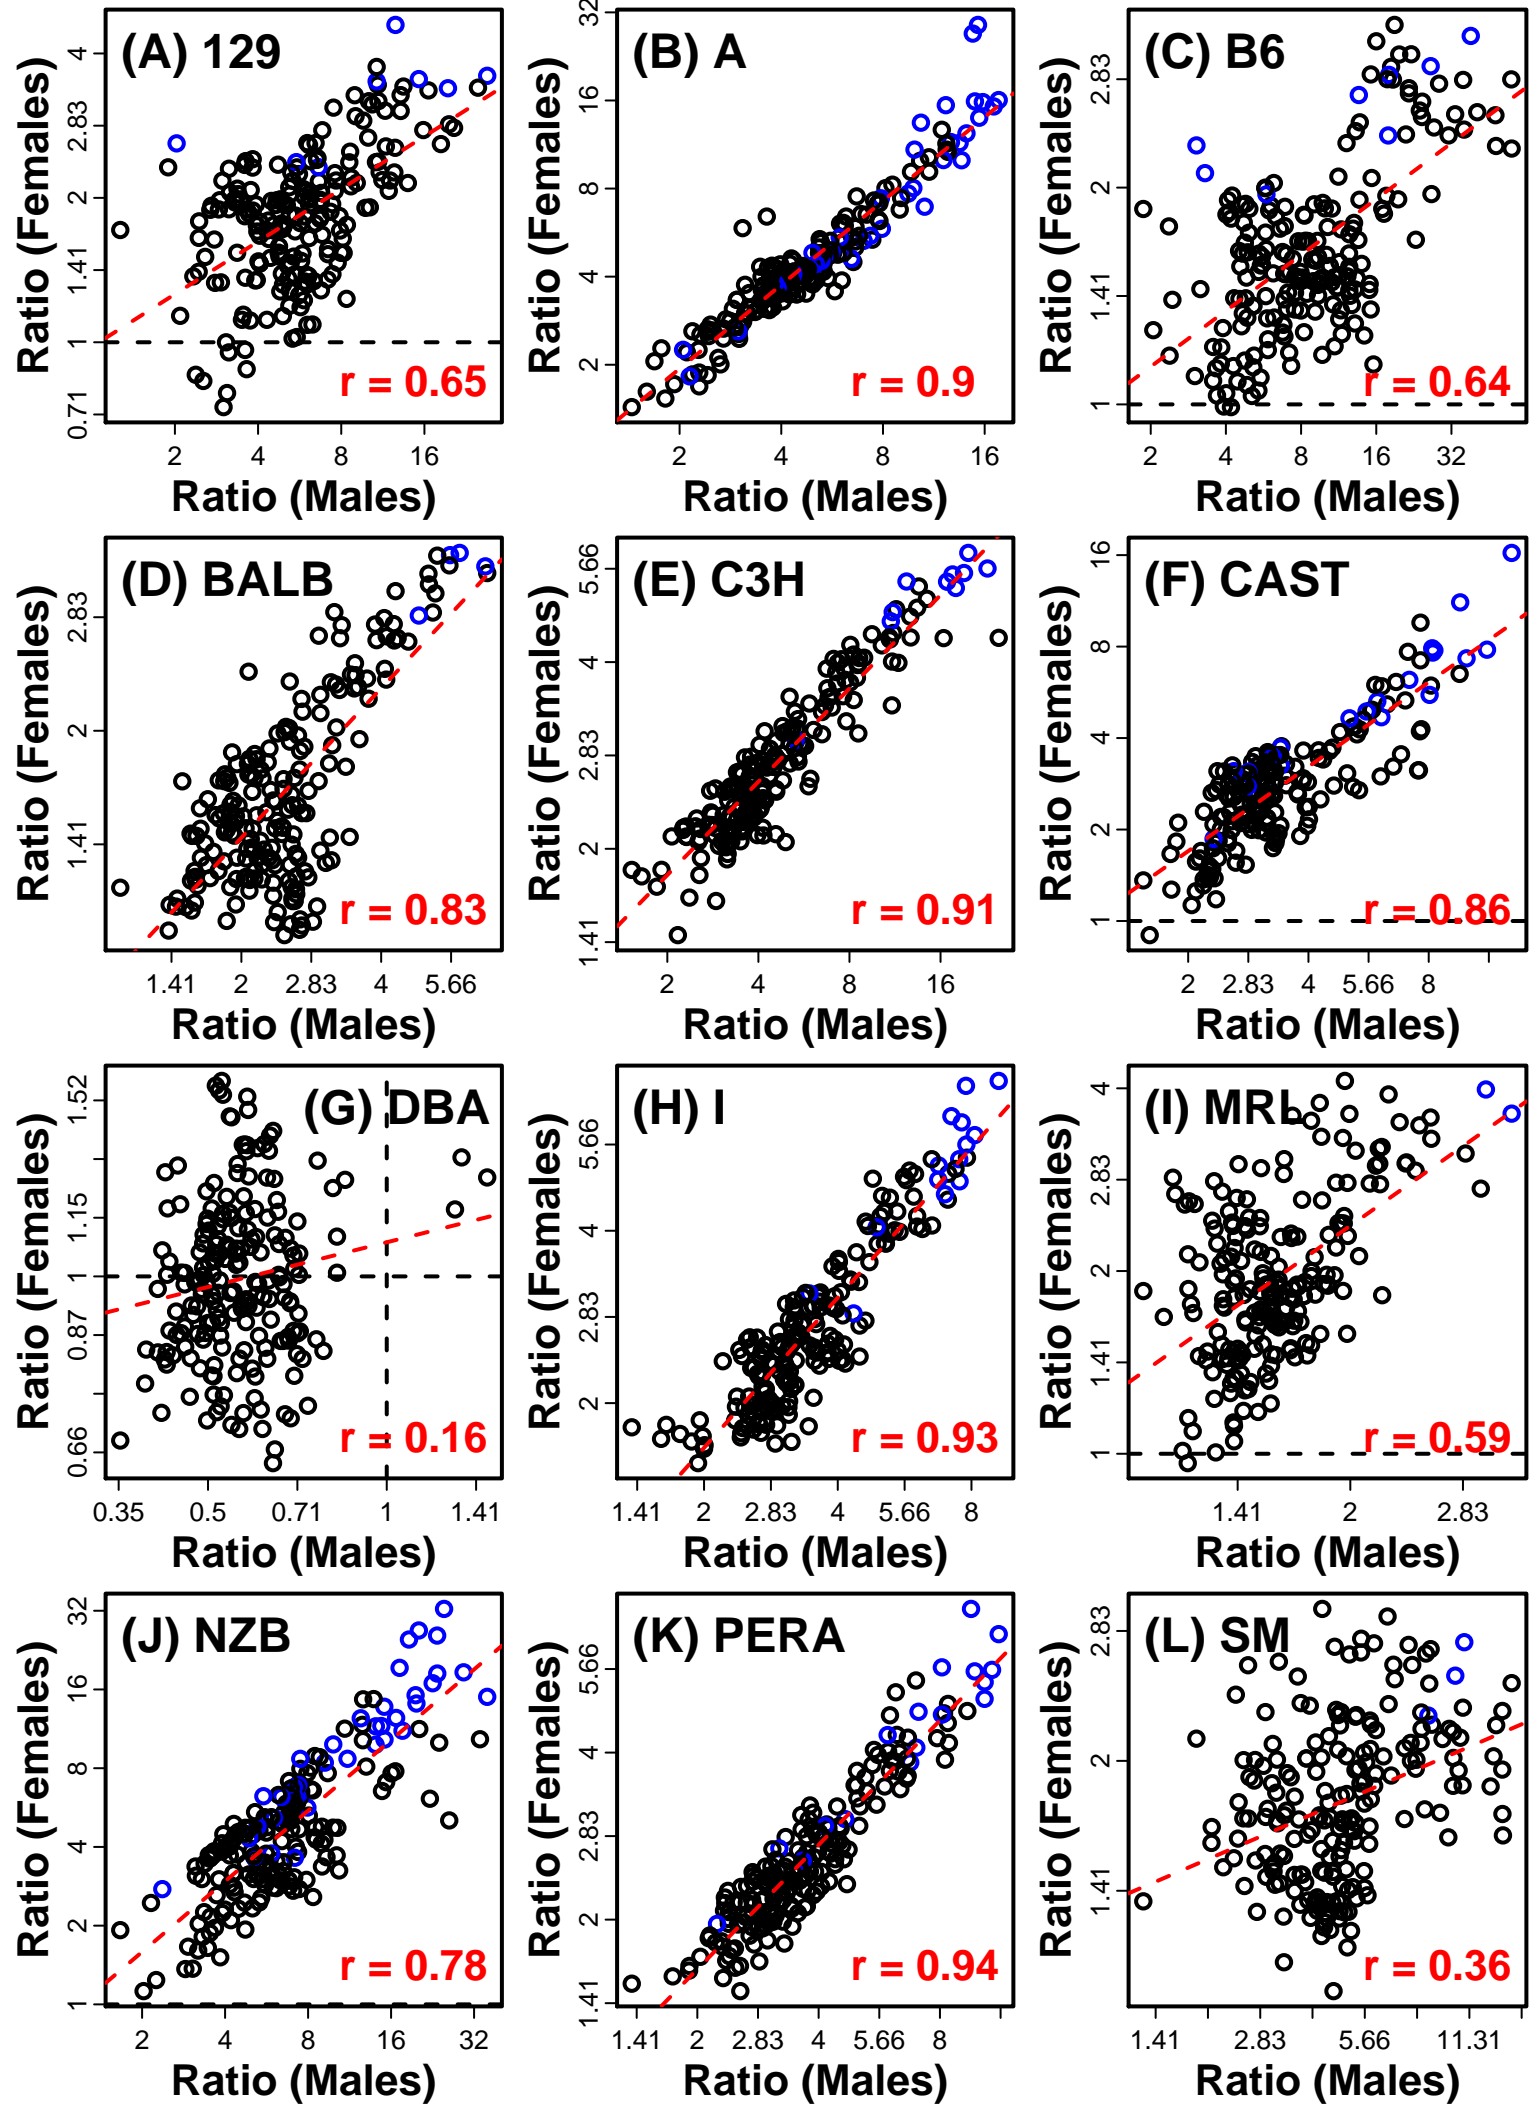

Supplement: S4 (10.1371/journal.pone.0011861.s004) [file journal.pone.0011861.s004]
