# Supplementary material for: Transcriptional Profiles of Leukocyte Populations Provide a Tool for Interpreting Gene Expression Patterns Associated with High Fat Diet in Mice
Source: PLOS journal article supplement (doi:10.1371/journal.pone.0011861), 2010-07-29
Supplement: S7 (10.1371/journal.pone.0011861.s007) [file journal.pone.0011861.s007]

**Table S1.** Data samples used to construct reference database for liver tissue (i.e., Treatment A from Figure 2). The procedure described in Figure 2 indicates that  $n_A$  arrays were used as a reference set to identify signature transcripts associated with a given cell population. A total of  $n_A = 56$  arrays were obtained from Gene Expression Omnibus and assigned to this reference set treatment. These 56 hybridizations are listed below. As indicated in the table, each sample corresponds to a hybridization that involves RNA extracted from liver of young male or female mice ( $\leq 16$  weeks of age).

| <b>Series</b> | <b>Samples</b>                      | <b>Age</b> | <b>Strain</b> | <b>Gender</b> |
|---------------|-------------------------------------|------------|---------------|---------------|
| GSE10246      | GSM258687<br>GSM258688              | 9 weeks    | C57BL6        | Male          |
| GSE10744      | GSM271266<br>GSM271269<br>GSM271278 | 12 weeks   | C3HEBFEJ      | Male          |
| GSE10744      | GSM271279<br>GSM271267<br>GSM271272 | 12 weeks   | C57BL6J       | Male          |
| GSE10744      | GSM271275<br>GSM271268<br>GSM271280 | 12 weeks   | AKRJ          | Male          |
| GSE10744      | GSM271270<br>GSM271283<br>GSM271274 | 12 weeks   | DBA2J         | Male          |
| GSE10744      | GSM271277<br>GSM271281<br>GSM271271 | 12 weeks   | AJ            | Male          |
| GSE10744      | GSM271282<br>GSM271276<br>GSM271273 | 12 weeks   | 129S2         | Male          |
| GSE9954       | GSM252074<br>GSM252075<br>GSM252076 | 11 weeks   | C57BL6        | Male          |
| GSE18293      | GSM456394<br>GSM456395<br>GSM456396 | 5 weeks    | Swiss Webster | Female        |
| GSE9441       | GSM239850<br>GSM239851<br>GSM239852 | 12 weeks   | AKRJ          | Male          |
| GSE9441       | GSM239856<br>GSM239857<br>GSM239858 | 12 weeks   | C57BL6J       | Male          |
| GSE9441       | GSM239862<br>GSM239863<br>GSM239864 | 12 weeks   | DBA2J         | Male          |
| GSE14395      | GSM359832<br>GSM359833              | 11 weeks   | SV129         | Male          |

|          |                                     |          |            |        |
|----------|-------------------------------------|----------|------------|--------|
|          | GSM359834                           |          |            |        |
| GSE14395 | GSM359838<br>GSM359839<br>GSM359840 | 11 weeks | SV129      | Female |
| GSE7357  | GSM177149<br>GSM177150<br>GSM177151 | 7 weeks  | C57BL6     | Male   |
| GSE7357  | GSM177155<br>GSM177156<br>GSM177157 | 7 weeks  | DBA2       | Male   |
| GSE8292  | GSM205766<br>GSM205767<br>GSM205768 | 16 weeks | 129S1SVIMJ | Male   |
| GSE12693 | GSM318346<br>GSM318643<br>GSM318644 | 10 weeks | BALBC      | Male   |
| GSE5959  | GSM138289<br>GSM138290<br>GSM138291 | 8 weeks  | C57BL6J    | Female |
